# Supplementary material for: Polydentate ligand construction: intramolecular condensation reactions in the synthesis of imine-containing ligands
Source: Royal Society of Chemistry journal article supplement (doi:10.1039/b111556a), 2002-01-01
Supplement: b111556a.doc [file b111556a.doc]

**Separation of [Co(tetraen)Cl]2+ isomers.** The [Co(tetraen)Cl]2+ reaction mixture was made up to 1 L with H2O and adsorbed onto a H+-Dowex column (19 x 10 cm). The column was initially eluted with HCl (0.5 M, ~2 L) to elute small cations etc, followed by elution with HCl (2.0 M) to elute a red band and HCl (3.0 M) to elute an orange band. The red band was taken to dryness on a rotary evaporator, while the orange band was taken to dryness at 80 C in order to allow the complexes to anate. The material from the red and orange bands was mixed and adsorbed onto a Sephadex column (120 x 3.5 cm) eluting with aqueous acidified Na2SO4 {Na2SO4 (0.1 M) and HCl (0.01 M)}. Three red bands were eluted and identified by comparison of their 13C{1H} NMR spectra with their literature values. The order in which the bands came off the column were: *fff*-[Co(tetraen)Cl]2+, *ffms*-[Co(tetraen)Cl]2+ and *ffma*-[Co(tetraen)Cl]2+. The bands were then isolated as the dichloride salts.
